# Supplementary material
Source: PubMed Central journal article supplement (PMC4657730)

# Supplementary Figure S1

## A Pdx1CreER;Xfp/+ (Pancreas)

| Lineage Label | % of Total Dapi+ cells |
|---------------|------------------------|
| RFP           | 29.37 +/- 2.06         |
| YFP           | 11.92 +/- 4.09         |
| CFP           | 17.42 +/- 4.09         |
| GFP           | 6.37 +/- 0.22          |
| Total         | 65.08 +/- 7.07         |

## B Cultured KPCX RFP tumor Cells

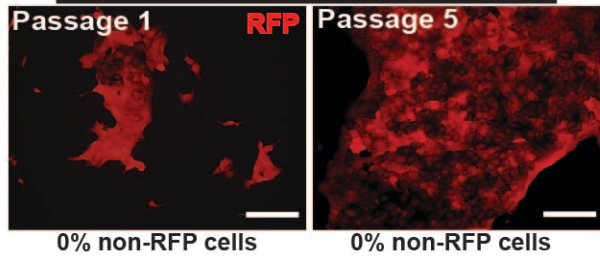

## C Time to tumor formation

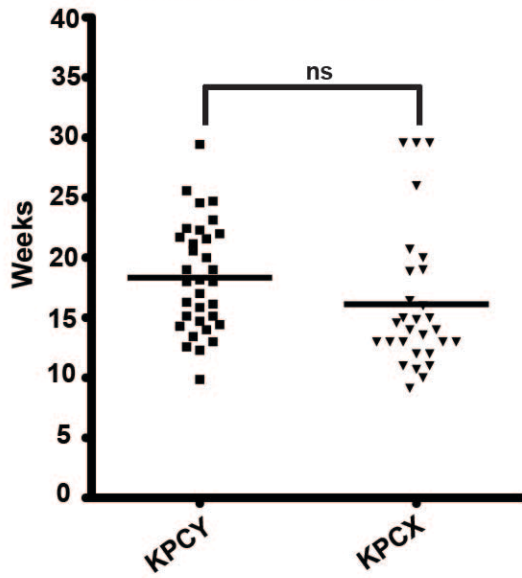

## D KPCY tumor KPCX tumor

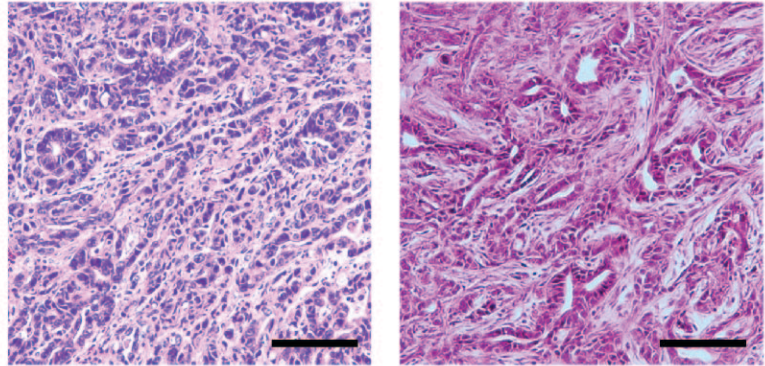

Supplementary Figure S2

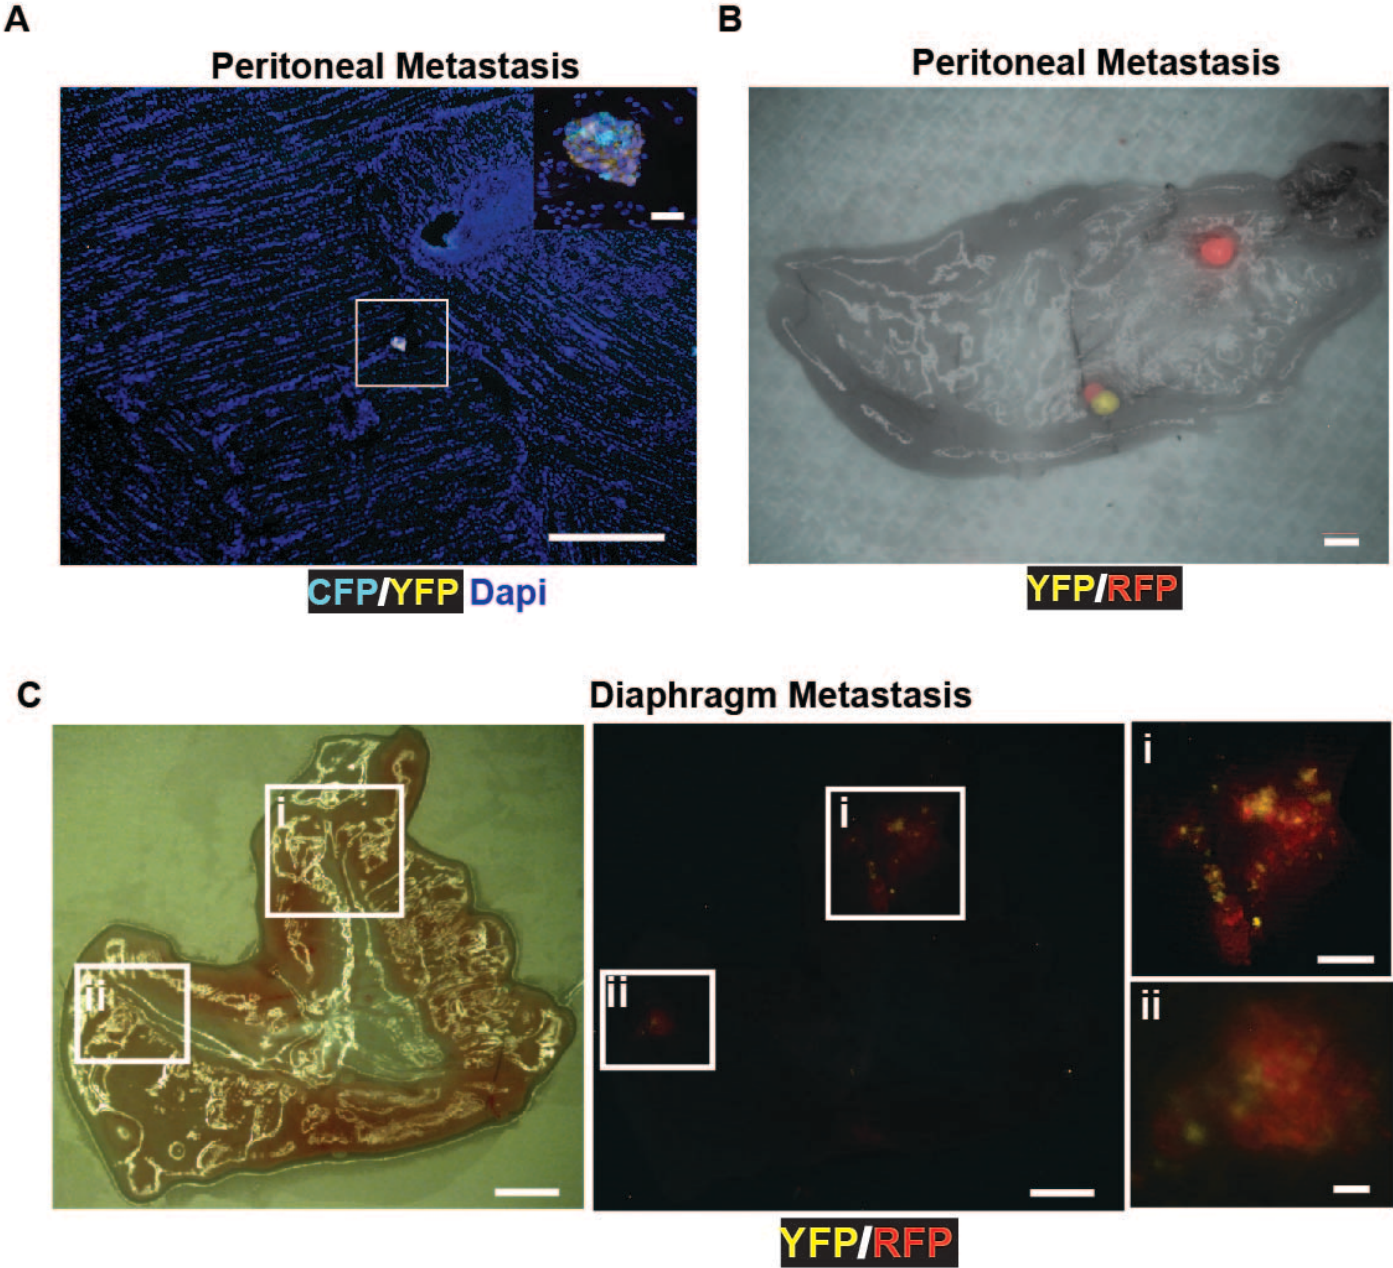

# Supplementary Figure S3

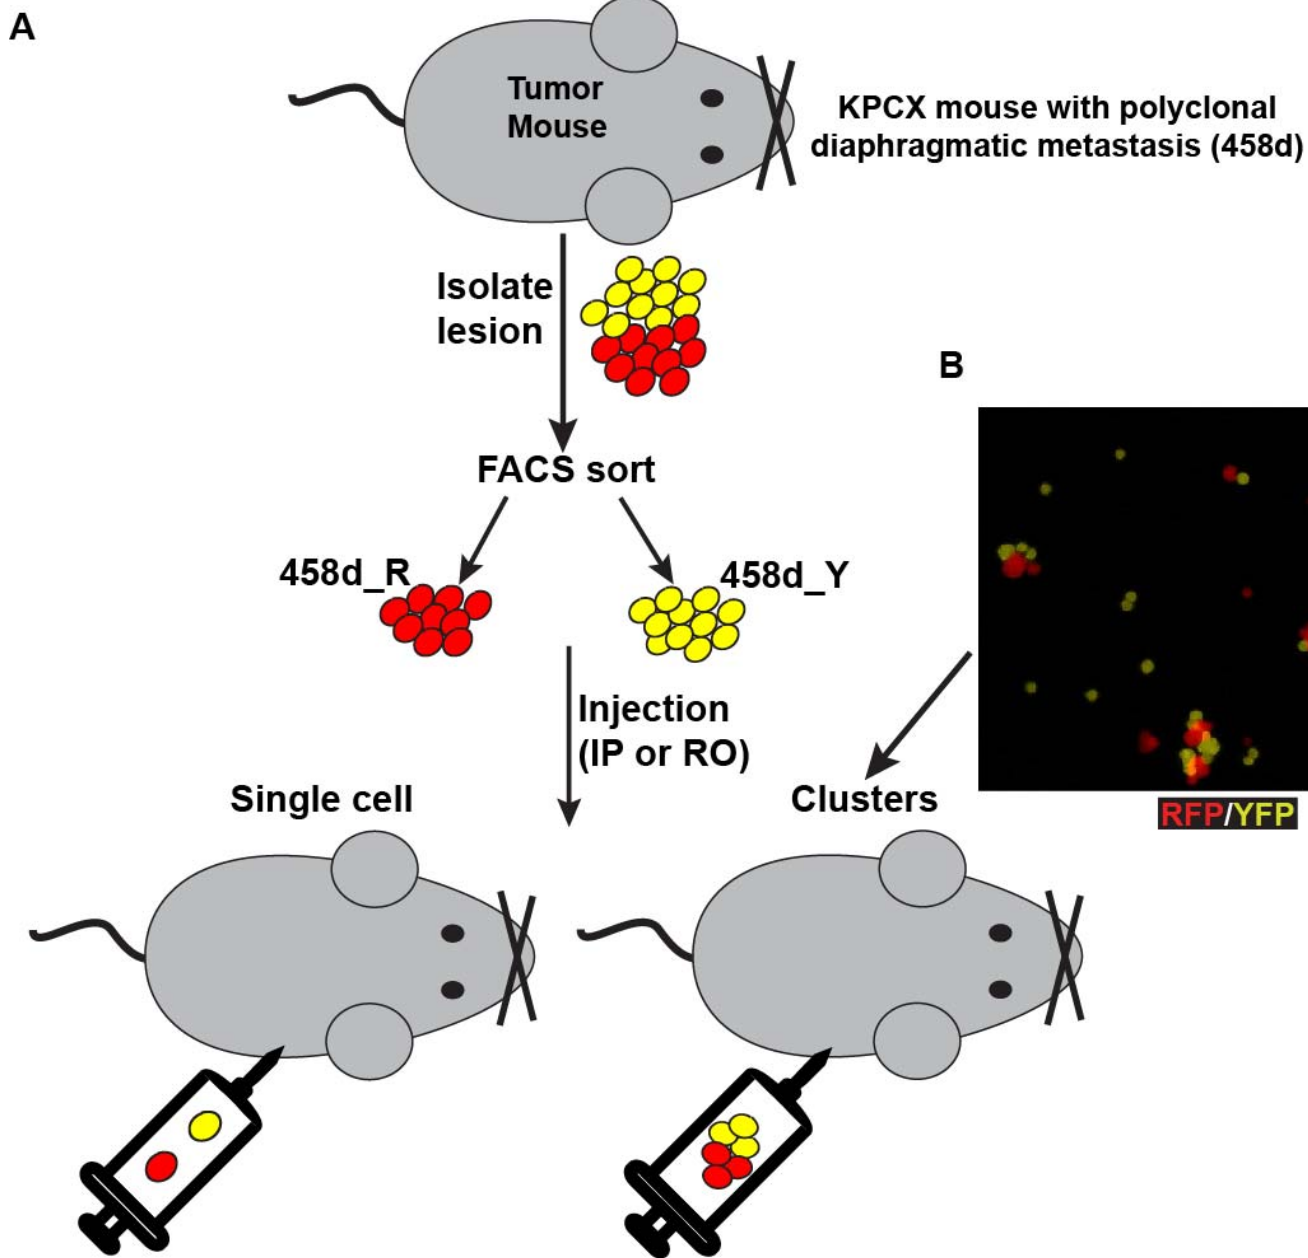

# Supplementary Figure S4

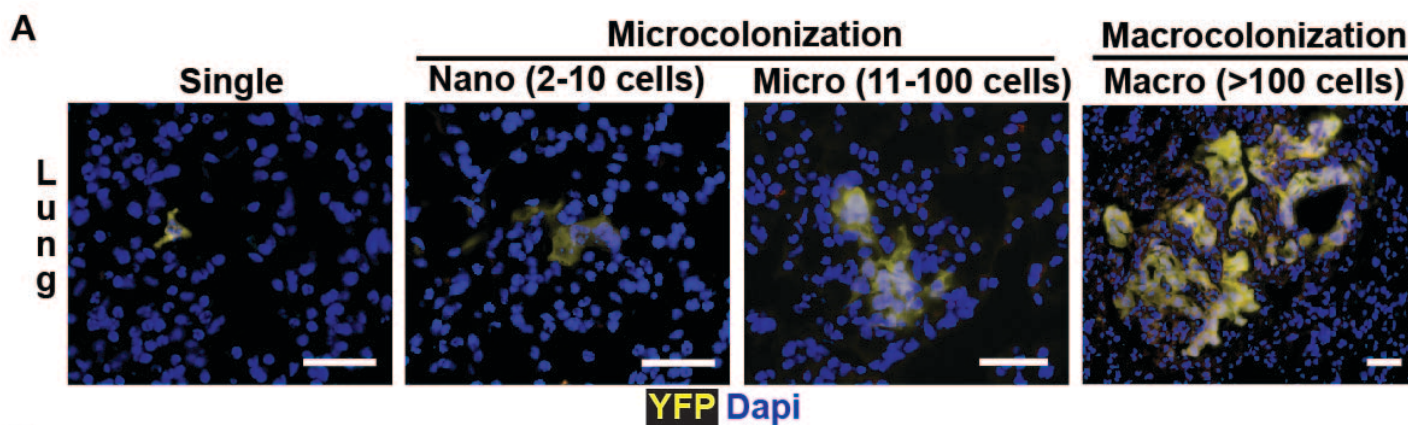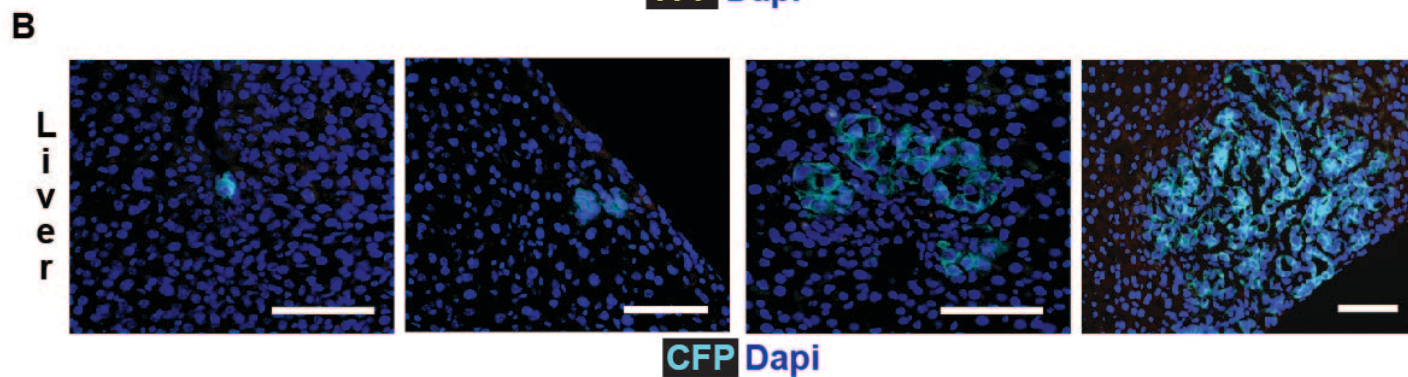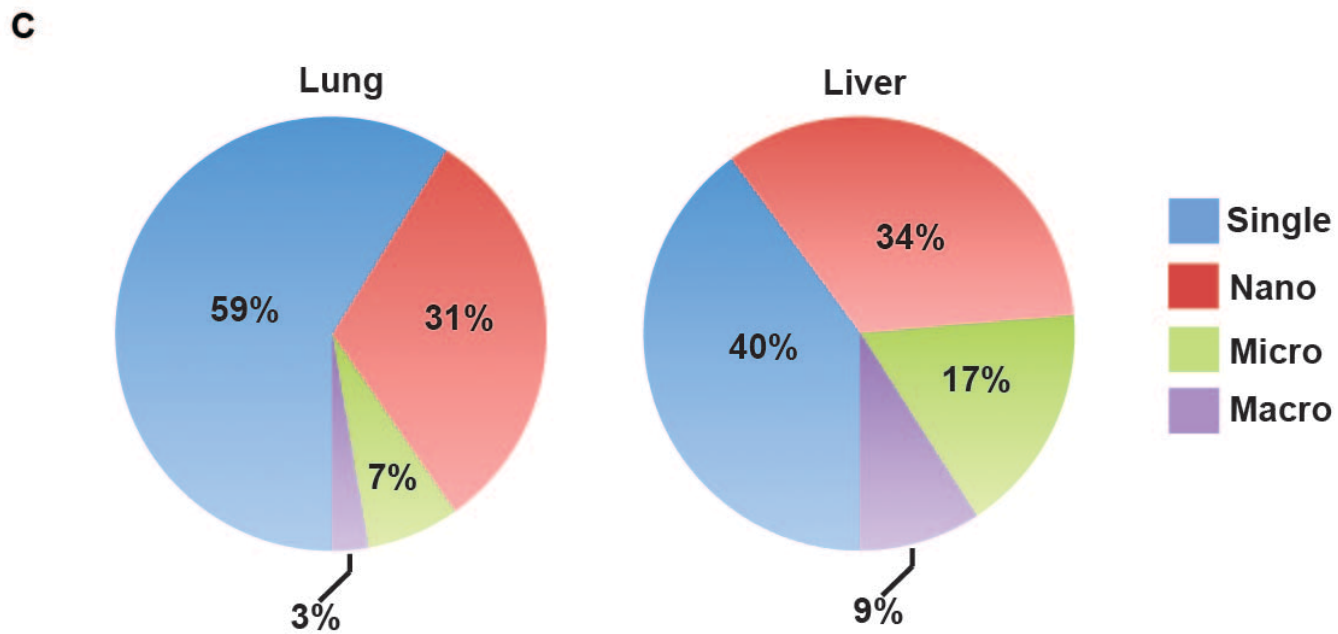

Supplementary Figure S5

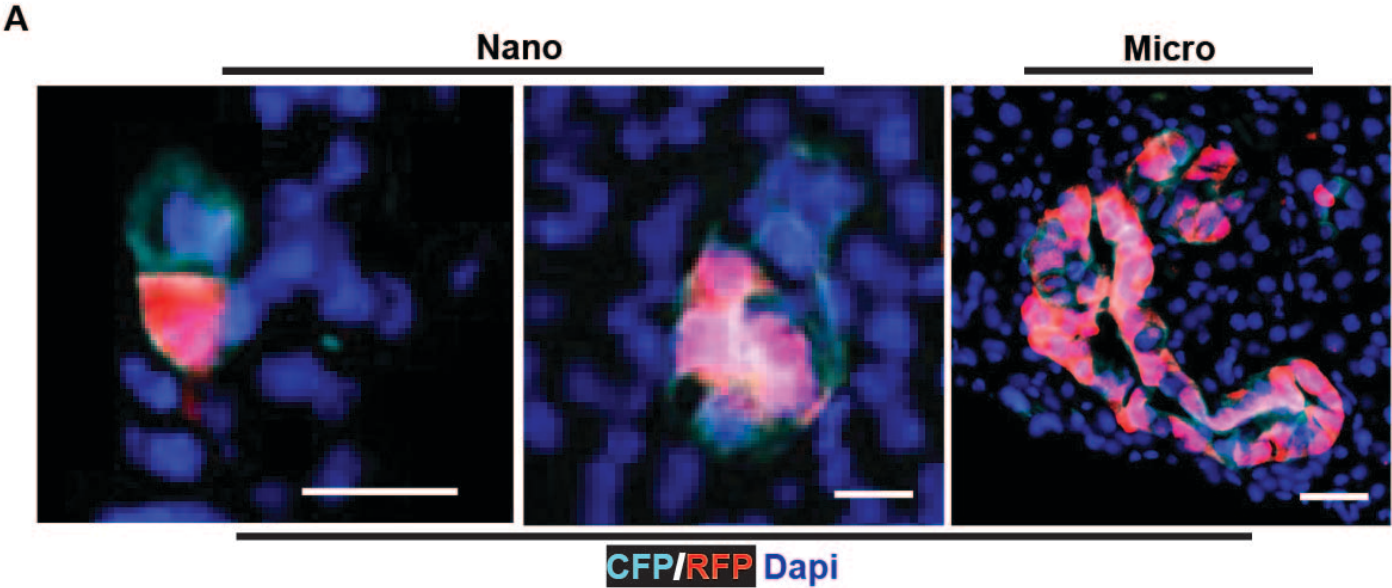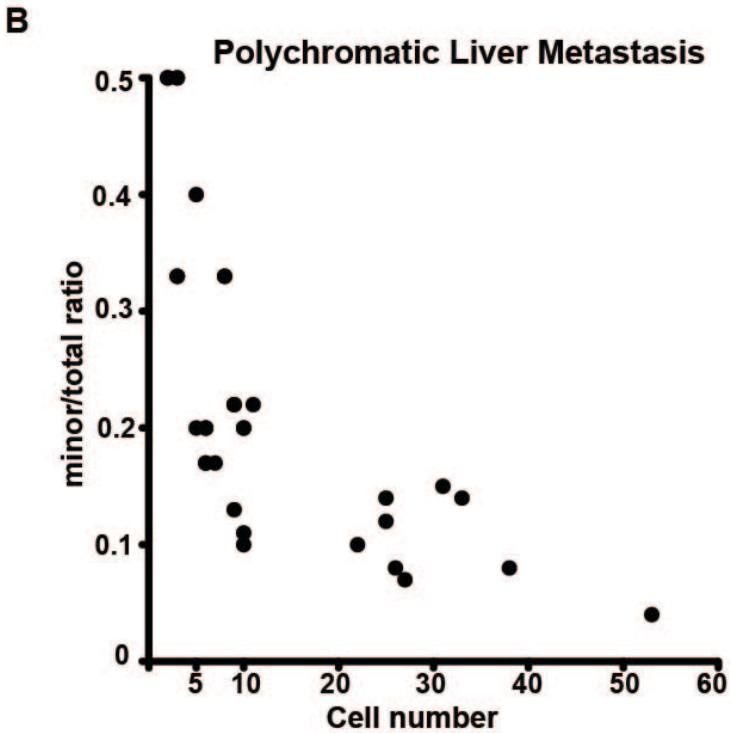

# Supplementary Figure S6

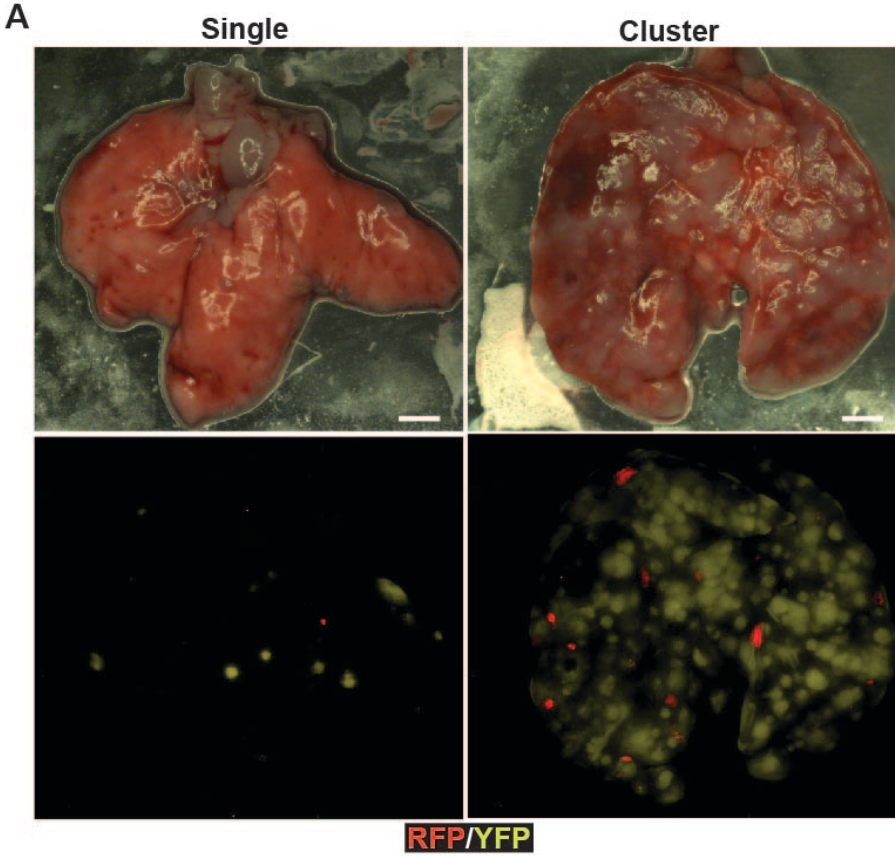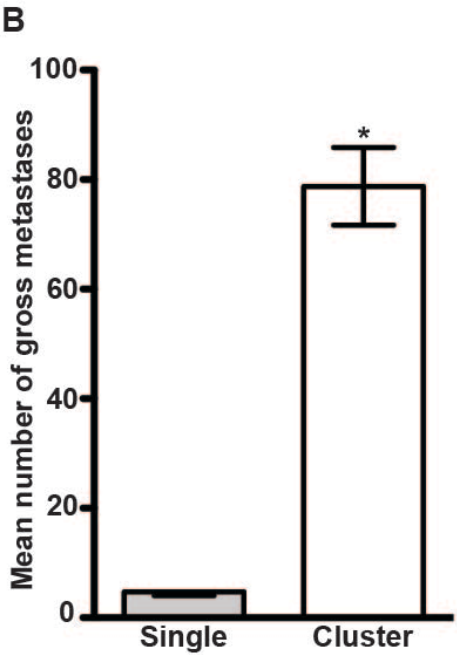

Supplement: NIHMS711521-supplement-2.pdf [file NIHMS711521-supplement-2.pdf]
